# Supplementary material
Source: MDPI journal article supplement (https://www.mdpi.com/2305-6290/7/3/46)
Supplement: s1 [file s1]

Table S1 Demand data based on 12 plots

| Family         | Crop No. | Crop            | Demand |
|----------------|----------|-----------------|--------|
| Chenopodiaceae | 1        | Sugar beet      | 3      |
| grass (Cereal) | 2        | Winter wheat    | 0      |
|                | 3        | Barley (spring) | 1      |
|                | 4        | Maize (silage)  | 1      |
|                | 5        | Wheat (spring)  | 1      |
| Nightshade     | 6        | Seed Potato     | 1      |
|                | 7        | Potatoes (ware) | 1      |
| Amaryllidaceae | 8        | Seed onion      | 0      |
|                | 9        | Onions          | 1      |
| Brassica       | 10       | Winter rapeseed | 0      |
| Apiaceae       | 11       | Winter carrot   | 1      |

Table S2 Distance Matrix

| Farm | Distance to Facility |
|------|----------------------|------|----------------------|------|----------------------|------|----------------------|------|----------------------|------|----------------------|------|----------------------|------|----------------------|------|----------------------|------|----------------------|
| F001 | 56                   | F101 | 45                   | F201 | 97                   | F301 | 67                   | F401 | 55                   | F501 | 107                  | F601 | 82                   | F701 | 77                   | F801 | 106                  | F901 | 89                   |
| F002 | 90                   | F102 | 99                   | F202 | 68                   | F302 | 109                  | F402 | 90                   | F502 | 106                  | F602 | 59                   | F702 | 93                   | F802 | 69                   | F902 | 74                   |
| F003 | 79                   | F103 | 65                   | F203 | 75                   | F303 | 87                   | F403 | 79                   | F503 | 72                   | F603 | 81                   | F703 | 55                   | F803 | 66                   | F903 | 93                   |
| F004 | 86                   | F104 | 61                   | F204 | 67                   | F304 | 54                   | F404 | 98                   | F504 | 80                   | F604 | 81                   | F704 | 71                   | F804 | 78                   | F904 | 75                   |
| F005 | 81                   | F105 | 72                   | F205 | 80                   | F305 | 87                   | F405 | 44                   | F505 | 59                   | F605 | 60                   | F705 | 80                   | F805 | 67                   | F905 | 61                   |
| F006 | 74                   | F106 | 77                   | F206 | 61                   | F306 | 56                   | F406 | 90                   | F506 | 52                   | F606 | 87                   | F706 | 64                   | F806 | 70                   | F906 | 78                   |
| F007 | 78                   | F107 | 83                   | F207 | 51                   | F307 | 81                   | F407 | 67                   | F507 | 83                   | F607 | 87                   | F707 | 87                   | F807 | 53                   | F907 | 82                   |
| F008 | 74                   | F108 | 65                   | F208 | 67                   | F308 | 63                   | F408 | 65                   | F508 | 63                   | F608 | 110                  | F708 | 102                  | F808 | 102                  | F908 | 70                   |
| F009 | 100                  | F109 | 64                   | F209 | 85                   | F309 | 66                   | F409 | 102                  | F509 | 107                  | F609 | 81                   | F709 | 71                   | F809 | 100                  | F909 | 82                   |
| F010 | 68                   | F110 | 77                   | F210 | 60                   | F310 | 95                   | F410 | 93                   | F510 | 80                   | F610 | 93                   | F710 | 84                   | F810 | 109                  | F910 | 96                   |
| F011 | 79                   | F111 | 68                   | F211 | 100                  | F311 | 95                   | F411 | 89                   | F511 | 100                  | F611 | 52                   | F711 | 56                   | F811 | 68                   | F911 | 76                   |
| F012 | 75                   | F112 | 68                   | F212 | 86                   | F312 | 100                  | F412 | 76                   | F512 | 87                   | F612 | 64                   | F712 | 96                   | F812 | 49                   | F912 | 50                   |
| F013 | 87                   | F113 | 100                  | F213 | 82                   | F313 | 90                   | F413 | 75                   | F513 | 76                   | F613 | 89                   | F713 | 32                   | F813 | 62                   | F913 | 92                   |
| F014 | 134                  | F114 | 76                   | F214 | 55                   | F314 | 97                   | F414 | 83                   | F514 | 107                  | F614 | 85                   | F714 | 67                   | F814 | 54                   | F914 | 57                   |
| F015 | 92                   | F115 | 94                   | F215 | 69                   | F315 | 80                   | F415 | 89                   | F515 | 83                   | F615 | 84                   | F715 | 102                  | F815 | 59                   | F915 | 59                   |

| Farm | Distance<br>to<br>Facility |
|------|----------------------------|------|----------------------------|------|----------------------------|------|----------------------------|------|----------------------------|------|----------------------------|------|----------------------------|------|----------------------------|------|----------------------------|------|----------------------------|
| F016 | 58                         | F116 | 79                         | F216 | 67                         | F316 | 96                         | F416 | 94                         | F516 | 47                         | F616 | 88                         | F716 | 88                         | F816 | 63                         | F916 | 63                         |
| F017 | 56                         | F117 | 90                         | F217 | 74                         | F317 | 66                         | F417 | 68                         | F517 | 57                         | F617 | 102                        | F717 | 87                         | F817 | 86                         | F917 | 69                         |
| F018 | 107                        | F118 | 121                        | F218 | 92                         | F318 | 109                        | F418 | 78                         | F518 | 66                         | F618 | 93                         | F718 | 66                         | F818 | 90                         | F918 | 89                         |
| F019 | 76                         | F119 | 107                        | F219 | 92                         | F319 | 64                         | F419 | 113                        | F519 | 67                         | F619 | 62                         | F719 | 49                         | F819 | 58                         | F919 | 96                         |
| F020 | 71                         | F120 | 94                         | F220 | 80                         | F320 | 88                         | F420 | 77                         | F520 | 77                         | F620 | 82                         | F720 | 106                        | F820 | 73                         | F920 | 91                         |
| F021 | 64                         | F121 | 51                         | F221 | 52                         | F321 | 61                         | F421 | 77                         | F521 | 85                         | F621 | 86                         | F721 | 73                         | F821 | 83                         | F921 | 74                         |
| F022 | 105                        | F122 | 90                         | F222 | 88                         | F322 | 51                         | F422 | 119                        | F522 | 53                         | F622 | 76                         | F722 | 72                         | F822 | 69                         | F922 | 57                         |
| F023 | 104                        | F123 | 70                         | F223 | 86                         | F323 | 79                         | F423 | 63                         | F523 | 76                         | F623 | 81                         | F723 | 85                         | F823 | 52                         | F923 | 106                        |
| F024 | 98                         | F124 | 75                         | F224 | 79                         | F324 | 62                         | F424 | 76                         | F524 | 55                         | F624 | 89                         | F724 | 86                         | F824 | 100                        | F924 | 78                         |
| F025 | 59                         | F125 | 124                        | F225 | 72                         | F325 | 65                         | F425 | 101                        | F525 | 83                         | F625 | 76                         | F725 | 80                         | F825 | 105                        | F925 | 71                         |
| F026 | 73                         | F126 | 57                         | F226 | 74                         | F326 | 98                         | F426 | 91                         | F526 | 108                        | F626 | 55                         | F726 | 55                         | F826 | 84                         | F926 | 104                        |
| F027 | 86                         | F127 | 73                         | F227 | 74                         | F327 | 74                         | F427 | 86                         | F527 | 87                         | F627 | 95                         | F727 | 77                         | F827 | 78                         | F927 | 75                         |
| F028 | 95                         | F128 | 82                         | F228 | 82                         | F328 | 117                        | F428 | 90                         | F528 | 97                         | F628 | 51                         | F728 | 65                         | F828 | 83                         | F928 | 80                         |
| F029 | 81                         | F129 | 87                         | F229 | 86                         | F329 | 103                        | F429 | 92                         | F529 | 120                        | F629 | 86                         | F729 | 85                         | F829 | 77                         | F929 | 55                         |
| F030 | 78                         | F130 | 69                         | F230 | 72                         | F330 | 73                         | F430 | 73                         | F530 | 98                         | F630 | 82                         | F730 | 67                         | F830 | 57                         | F930 | 64                         |
| F031 | 61                         | F131 | 78                         | F231 | 74                         | F331 | 93                         | F431 | 76                         | F531 | 85                         | F631 | 95                         | F731 | 86                         | F831 | 77                         | F931 | 97                         |
| F032 | 83                         | F132 | 97                         | F232 | 68                         | F332 | 81                         | F432 | 85                         | F532 | 74                         | F632 | 99                         | F732 | 65                         | F832 | 68                         | F932 | 45                         |
| F033 | 116                        | F133 | 46                         | F233 | 58                         | F333 | 59                         | F433 | 89                         | F533 | 98                         | F633 | 71                         | F733 | 76                         | F833 | 67                         | F933 | 86                         |
| F034 | 89                         | F134 | 53                         | F234 | 68                         | F334 | 79                         | F434 | 86                         | F534 | 63                         | F634 | 72                         | F734 | 67                         | F834 | 70                         | F934 | 99                         |
| F035 | 92                         | F135 | 84                         | F235 | 79                         | F335 | 94                         | F435 | 70                         | F535 | 77                         | F635 | 63                         | F735 | 87                         | F835 | 92                         | F935 | 63                         |
| F036 | 57                         | F136 | 47                         | F236 | 96                         | F336 | 81                         | F436 | 87                         | F536 | 83                         | F636 | 95                         | F736 | 79                         | F836 | 83                         | F936 | 74                         |
| F037 | 82                         | F137 | 84                         | F237 | 71                         | F337 | 82                         | F437 | 73                         | F537 | 83                         | F637 | 76                         | F737 | 46                         | F837 | 75                         | F937 | 52                         |
| F038 | 96                         | F138 | 83                         | F238 | 83                         | F338 | 89                         | F438 | 97                         | F538 | 81                         | F638 | 90                         | F738 | 69                         | F838 | 54                         | F938 | 77                         |
| F039 | 73                         | F139 | 55                         | F239 | 86                         | F339 | 55                         | F439 | 77                         | F539 | 99                         | F639 | 86                         | F739 | 72                         | F839 | 73                         | F939 | 97                         |
| F040 | 81                         | F140 | 52                         | F240 | 77                         | F340 | 51                         | F440 | 90                         | F540 | 83                         | F640 | 104                        | F740 | 73                         | F840 | 109                        | F940 | 91                         |
| F041 | 71                         | F141 | 80                         | F241 | 85                         | F341 | 80                         | F441 | 72                         | F541 | 69                         | F641 | 88                         | F741 | 96                         | F841 | 81                         | F941 | 38                         |
| F042 | 77                         | F142 | 73                         | F242 | 67                         | F342 | 80                         | F442 | 48                         | F542 | 82                         | F642 | 79                         | F742 | 87                         | F842 | 61                         | F942 | 58                         |
| F043 | 59                         | F143 | 88                         | F243 | 59                         | F343 | 53                         | F443 | 79                         | F543 | 77                         | F643 | 74                         | F743 | 82                         | F843 | 77                         | F943 | 75                         |
| F044 | 89                         | F144 | 71                         | F244 | 90                         | F344 | 66                         | F444 | 80                         | F544 | 75                         | F644 | 91                         | F744 | 74                         | F844 | 77                         | F944 | 77                         |
| F045 | 46                         | F145 | 80                         | F245 | 69                         | F345 | 49                         | F445 | 80                         | F545 | 58                         | F645 | 77                         | F745 | 67                         | F845 | 85                         | F945 | 89                         |
| F046 | 89                         | F146 | 62                         | F246 | 79                         | F346 | 65                         | F446 | 60                         | F546 | 56                         | F646 | 28                         | F746 | 79                         | F846 | 84                         | F946 | 100                        |
| F047 | 77                         | F147 | 77                         | F247 | 89                         | F347 | 62                         | F447 | 64                         | F547 | 76                         | F647 | 75                         | F747 | 64                         | F847 | 72                         | F947 | 65                         |
| F048 | 35                         | F148 | 77                         | F248 | 74                         | F348 | 66                         | F448 | 89                         | F548 | 105                        | F648 | 93                         | F748 | 77                         | F848 | 64                         | F948 | 84                         |
| F049 | 78                         | F149 | 90                         | F249 | 94                         | F349 | 83                         | F449 | 93                         | F549 | 78                         | F649 | 82                         | F749 | 82                         | F849 | 90                         | F949 | 60                         |
| F050 | 81                         | F150 | 95                         | F250 | 68                         | F350 | 43                         | F450 | 90                         | F550 | 96                         | F650 | 76                         | F750 | 95                         | F850 | 63                         | F950 | 76                         |
| F051 | 63                         | F151 | 105                        | F251 | 79                         | F351 | 89                         | F451 | 92                         | F551 | 109                        | F651 | 78                         | F751 | 80                         | F851 | 59                         | F951 | 92                         |
| F052 | 77                         | F152 | 72                         | F252 | 60                         | F352 | 69                         | F452 | 97                         | F552 | 87                         | F652 | 80                         | F752 | 96                         | F852 | 67                         | F952 | 98                         |
| F053 | 69                         | F153 | 91                         | F253 | 64                         | F353 | 78                         | F453 | 91                         | F553 | 44                         | F653 | 70                         | F753 | 77                         | F853 | 44                         | F953 | 77                         |
| F054 | 97                         | F154 | 74                         | F254 | 74                         | F354 | 67                         | F454 | 54                         | F554 | 97                         | F654 | 86                         | F754 | 122                        | F854 | 99                         | F954 | 77                         |
| F055 | 67                         | F155 | 57                         | F255 | 82                         | F355 | 49                         | F455 | 55                         | F555 | 80                         | F655 | 74                         | F755 | 68                         | F855 | 77                         | F955 | 85                         |
| F056 | 66                         | F156 | 84                         | F256 | 31                         | F356 | 40                         | F456 | 76                         | F556 | 114                        | F656 | 90                         | F756 | 79                         | F856 | 85                         | F956 | 87                         |

| Farm | Distance<br>to<br>Facility |
|------|----------------------------|------|----------------------------|------|----------------------------|------|----------------------------|------|----------------------------|------|----------------------------|------|----------------------------|------|----------------------------|------|----------------------------|------|----------------------------|
| F057 | 71                         | F157 | 68                         | F257 | 90                         | F357 | 96                         | F457 | 84                         | F557 | 80                         | F657 | 63                         | F757 | 67                         | F857 | 71                         | F957 | 33                         |
| F058 | 101                        | F158 | 81                         | F258 | 94                         | F358 | 110                        | F458 | 96                         | F558 | 86                         | F658 | 76                         | F758 | 76                         | F858 | 73                         | F958 | 82                         |
| F059 | 66                         | F159 | 78                         | F259 | 81                         | F359 | 68                         | F459 | 75                         | F559 | 54                         | F659 | 70                         | F759 | 59                         | F859 | 83                         | F959 | 31                         |
| F060 | 78                         | F160 | 93                         | F260 | 79                         | F360 | 84                         | F460 | 70                         | F560 | 80                         | F660 | 87                         | F760 | 59                         | F860 | 113                        | F960 | 57                         |
| F061 | 73                         | F161 | 89                         | F261 | 60                         | F361 | 99                         | F461 | 74                         | F561 | 75                         | F661 | 91                         | F761 | 71                         | F861 | 55                         | F961 | 102                        |
| F062 | 103                        | F162 | 96                         | F262 | 59                         | F362 | 73                         | F462 | 111                        | F562 | 84                         | F662 | 62                         | F762 | 79                         | F862 | 87                         | F962 | 80                         |
| F063 | 73                         | F163 | 66                         | F263 | 72                         | F363 | 62                         | F463 | 65                         | F563 | 78                         | F663 | 81                         | F763 | 69                         | F863 | 90                         | F963 | 72                         |
| F064 | 91                         | F164 | 70                         | F264 | 79                         | F364 | 93                         | F464 | 72                         | F564 | 70                         | F664 | 85                         | F764 | 83                         | F864 | 67                         | F964 | 55                         |
| F065 | 79                         | F165 | 67                         | F265 | 49                         | F365 | 37                         | F465 | 92                         | F565 | 80                         | F665 | 82                         | F765 | 63                         | F865 | 78                         | F965 | 78                         |
| F066 | 32                         | F166 | 95                         | F266 | 89                         | F366 | 95                         | F466 | 67                         | F566 | 82                         | F666 | 57                         | F766 | 71                         | F866 | 89                         | F966 | 86                         |
| F067 | 57                         | F167 | 60                         | F267 | 73                         | F367 | 67                         | F467 | 77                         | F567 | 45                         | F667 | 98                         | F767 | 100                        | F867 | 62                         | F967 | 75                         |
| F068 | 42                         | F168 | 68                         | F268 | 111                        | F368 | 78                         | F468 | 102                        | F568 | 75                         | F668 | 81                         | F768 | 80                         | F868 | 86                         | F968 | 66                         |
| F069 | 89                         | F169 | 85                         | F269 | 70                         | F369 | 98                         | F469 | 79                         | F569 | 78                         | F669 | 57                         | F769 | 78                         | F869 | 71                         | F969 | 87                         |
| F070 | 90                         | F170 | 75                         | F270 | 57                         | F370 | 61                         | F470 | 72                         | F570 | 79                         | F670 | 84                         | F770 | 101                        | F870 | 86                         | F970 | 83                         |
| F071 | 87                         | F171 | 55                         | F271 | 85                         | F371 | 84                         | F471 | 73                         | F571 | 84                         | F671 | 70                         | F771 | 108                        | F871 | 76                         | F971 | 84                         |
| F072 | 83                         | F172 | 87                         | F272 | 60                         | F372 | 98                         | F472 | 106                        | F572 | 92                         | F672 | 79                         | F772 | 53                         | F872 | 77                         | F972 | 52                         |
| F073 | 69                         | F173 | 68                         | F273 | 73                         | F373 | 92                         | F473 | 92                         | F573 | 85                         | F673 | 87                         | F773 | 52                         | F873 | 55                         | F973 | 48                         |
| F074 | 62                         | F174 | 89                         | F274 | 99                         | F374 | 82                         | F474 | 93                         | F574 | 80                         | F674 | 80                         | F774 | 73                         | F874 | 102                        | F974 | 66                         |
| F075 | 64                         | F175 | 79                         | F275 | 73                         | F375 | 56                         | F475 | 74                         | F575 | 72                         | F675 | 59                         | F775 | 86                         | F875 | 84                         | F975 | 77                         |
| F076 | 89                         | F176 | 72                         | F276 | 83                         | F376 | 82                         | F476 | 54                         | F576 | 69                         | F676 | 69                         | F776 | 81                         | F876 | 54                         | F976 | 87                         |
| F077 | 101                        | F177 | 78                         | F277 | 78                         | F377 | 59                         | F477 | 91                         | F577 | 63                         | F677 | 65                         | F777 | 71                         | F877 | 75                         | F977 | 82                         |
| F078 | 75                         | F178 | 88                         | F278 | 81                         | F378 | 64                         | F478 | 70                         | F578 | 68                         | F678 | 82                         | F778 | 78                         | F878 | 104                        | F978 | 50                         |
| F079 | 84                         | F179 | 66                         | F279 | 88                         | F379 | 61                         | F479 | 75                         | F579 | 90                         | F679 | 72                         | F779 | 37                         | F879 | 80                         | F979 | 101                        |
| F080 | 73                         | F180 | 80                         | F280 | 77                         | F380 | 57                         | F480 | 102                        | F580 | 61                         | F680 | 98                         | F780 | 74                         | F880 | 96                         | F980 | 95                         |
| F081 | 87                         | F181 | 89                         | F281 | 80                         | F381 | 82                         | F481 | 83                         | F581 | 66                         | F681 | 79                         | F781 | 81                         | F881 | 61                         | F981 | 64                         |
| F082 | 89                         | F182 | 88                         | F282 | 84                         | F382 | 84                         | F482 | 98                         | F582 | 52                         | F682 | 73                         | F782 | 99                         | F882 | 70                         | F982 | 67                         |
| F083 | 73                         | F183 | 76                         | F283 | 74                         | F383 | 80                         | F483 | 86                         | F583 | 66                         | F683 | 89                         | F783 | 66                         | F883 | 68                         | F983 | 61                         |
| F084 | 85                         | F184 | 65                         | F284 | 86                         | F384 | 62                         | F484 | 88                         | F584 | 71                         | F684 | 100                        | F784 | 82                         | F884 | 100                        | F984 | 93                         |
| F085 | 75                         | F185 | 75                         | F285 | 98                         | F385 | 58                         | F485 | 81                         | F585 | 63                         | F685 | 90                         | F785 | 62                         | F885 | 107                        | F985 | 83                         |
| F086 | 65                         | F186 | 71                         | F286 | 61                         | F386 | 64                         | F486 | 99                         | F586 | 57                         | F686 | 94                         | F786 | 74                         | F886 | 122                        | F986 | 80                         |
| F087 | 91                         | F187 | 93                         | F287 | 70                         | F387 | 83                         | F487 | 74                         | F587 | 80                         | F687 | 77                         | F787 | 107                        | F887 | 86                         | F987 | 120                        |
| F088 | 80                         | F188 | 71                         | F288 | 78                         | F388 | 121                        | F488 | 59                         | F588 | 95                         | F688 | 76                         | F788 | 63                         | F888 | 71                         | F988 | 88                         |
| F089 | 103                        | F189 | 69                         | F289 | 74                         | F389 | 65                         | F489 | 67                         | F589 | 32                         | F689 | 81                         | F789 | 106                        | F889 | 75                         | F989 | 49                         |
| F090 | 82                         | F190 | 91                         | F290 | 96                         | F390 | 89                         | F490 | 76                         | F590 | 57                         | F690 | 58                         | F790 | 65                         | F890 | 78                         | F990 | 76                         |
| F091 | 64                         | F191 | 107                        | F291 | 62                         | F391 | 76                         | F491 | 80                         | F591 | 62                         | F691 | 88                         | F791 | 78                         | F891 | 62                         | F991 | 81                         |
| F092 | 83                         | F192 | 83                         | F292 | 61                         | F392 | 110                        | F492 | 91                         | F592 | 69                         | F692 | 78                         | F792 | 87                         | F892 | 65                         | F992 | 68                         |
| F093 | 76                         | F193 | 62                         | F293 | 82                         | F393 | 74                         | F493 | 56                         | F593 | 86                         | F693 | 70                         | F793 | 49                         | F893 | 59                         | F993 | 103                        |
| F094 | 68                         | F194 | 71                         | F294 | 70                         | F394 | 56                         | F494 | 91                         | F594 | 96                         | F694 | 96                         | F794 | 67                         | F894 | 84                         | F994 | 52                         |
| F095 | 83                         | F195 | 44                         | F295 | 100                        | F395 | 105                        | F495 | 71                         | F595 | 82                         | F695 | 77                         | F795 | 86                         | F895 | 94                         | F995 | 69                         |
| F096 | 76                         | F196 | 75                         | F296 | 62                         | F396 | 77                         | F496 | 120                        | F596 | 85                         | F696 | 113                        | F796 | 91                         | F896 | 81                         | F996 | 86                         |
| F097 | 83                         | F197 | 53                         | F297 | 98                         | F397 | 92                         | F497 | 74                         | F597 | 81                         | F697 | 90                         | F797 | 66                         | F897 | 81                         | F997 | 85                         |

| Farm | Distance<br>to<br>Facility | Farm  | Distance<br>to<br>Facility |
|------|----------------------------|------|----------------------------|------|----------------------------|------|----------------------------|------|----------------------------|------|----------------------------|------|----------------------------|------|----------------------------|------|----------------------------|-------|----------------------------|
| F098 | 68                         | F198 | 78                         | F298 | 66                         | F398 | 83                         | F498 | 86                         | F598 | 63                         | F698 | 79                         | F798 | 76                         | F898 | 73                         | F998  | 64                         |
| F099 | 76                         | F199 | 66                         | F299 | 98                         | F399 | 91                         | F499 | 51                         | F599 | 82                         | F699 | 74                         | F799 | 56                         | F899 | 89                         | F999  | 41                         |
| F100 | 94                         | F200 | 95                         | F300 | 52                         | F400 | 72                         | F500 | 85                         | F600 | 91                         | F700 | 105                        | F800 | 57                         | F900 | 86                         | F1000 | 85                         |
